# Supplementary material for: Determining High Conservation Values in Production Landscapes: Biodiversity and Assessment Approaches
Source: Frontiers journal article supplement (doi:10.3389/fenvs.2022.783794), 2022-07-06
Supplement: Table_6.docx [file Table_6.docx]

Supplementary Table 6. List of fishes documented in SPFZ. * indicates species that were newly described during the study. CITATIONS.

| **Family** | **Species** | **IUCN** |
| --- | --- | --- |
| Anabantidae | *Anabas testudineus* |  |
| Channidae | *Channa baramensis* |  |
|  | *Channa lucius* |  |
|  | *Channa striata* |  |
| Nandidae | *Nandus nebulosus* |  |
| Osphronemidae | *Betta akarensis* |  |
|  | *Luciocephalus pulcher* |  |
|  | *Osphronemus goramy* |  |
|  | *Trichopodus pectoralis* |  |
|  | *Trichopodus trichopterus* |  |
| Pristolepididae | *Pristolepis fasciata* |  |
| Phallostethidae | *Phenacostethus smithi* |  |
| Zenarchopteridae | *Dermogenys collettei* |  |
|  | *Hemirhamphodon kuekenthali* |  |
| Cichlidae | *Oreochromis niloticus* |  |
| Balitoridae | *Homaloptera orthogoniata* |  |
|  | *Homaloptera weberi* |  |
|  | *Homalopteroides stephensoni* |  |
|  | *Homalopteroides tweediei* |  |
|  | *Nemacheilus spiniferus* |  |
|  | *Neogastromyzon chini* |  |
| Barbuccidae | *Barbucca diabolica* |  |
| Cobitidae | *Acanthopsoides robertsi* |  |
|  | *Pangio semicincta* |  |
|  | *Pangio shelfordii* |  |
| Cyprinidae | *Barbodes banksi* |  |
|  | *Barbodes kuchingensis* |  |
|  | *Barbonymus schwanenfeldii* |  |
|  | *Cyclocheilichthys apogon* |  |
|  | *Desmopuntius johorensis* |  |
|  | *Esomus metallicus* |  |
|  | *Garra borneensis* |  |
|  | *Hampala bimaculata* |  |
|  | *Hampala macrolepidota* |  |
|  | *Labiobarbus leptocheilus* |  |
|  | *Leptobarbus hosii* |  |
|  | *Lobocheilos bo* |  |
|  | *Nematabramis steindachnerii* |  |
|  | *Osteochilus microcephalus* |  |
|  | *Osteochilus vittatus* |  |
|  | *Oxygaster anomalura* |  |
|  | *Rasbora cephalotaenia* |  |
|  | *Rasbora dusonensis* |  |
|  | *Rasbora einthovenii* |  |
|  | *Rasbora ennealepis* | NT |
|  | *Rasbora hosii* |  |
|  | *Rasbora kottelati* |  |
|  | *Rasbora marinae** |  |
|  | *Rasbora tornieri* |  |
|  | *Rasbora trilineata* |  |
|  | *Systomus banksi* |  |
|  | *Tor douronensis* |  |
|  | *Trigonopoma pauciperforatum* |  |
| Gastromyzontidae | *Gastromyzon megalepis* |  |
|  | *Gastromyzon viriosus* | NT |
| Butidae | *Butis amboinensis* |  |
|  | *Oxyeleotris marmorata* |  |
|  | *Oxyeleotris urophthalmus* |  |
| Eleotridae | *Eleotris melanosoma* |  |
| Oxudercidae | *Eugnathogobius siamensis* |  |
|  | *Pseudogobiopsis oligactis* |  |
|  | *Stenogobius ingeri* |  |
| Bagridae | *Bagroides melapterus* |  |
|  | *Hemibagrus capitulum* |  |
|  | *Hemibagrus fortis* |  |
|  | *Hemibagrus hoevenii* |  |
|  | *Hemibagrus nemuris* |  |
|  | *Leiocassis hosii* |  |
|  | *Pseudomystus sp.* |  |
| Clariidae | *Clarias leiacanthus* |  |
|  | *Clarias nieuhofii* |  |
|  | *Clarias planiceps* |  |
| Pangasiidae | *Pseudolais micronemus* |  |
| Siluridae | *Kryptopterus cryptopterus* |  |
|  | *Kryptopterus limpok* |  |
|  | *Pterocryptis furnessi* |  |
|  | *Silurichthys marmoratus* |  |
|  | *Wallago leerii* |  |
| Sisoridae | *Glyptothorax exodon* | VU |
|  | *Glyptothorax major* |  |
| Mastacembelidae | *Macrognathus circumcinctus* |  |
|  | *Macrognathus maculatus* |  |
|  | *Mastacembelus unicolor* |  |
| Synbranchidae | *Monopterus albus* |  |
|  | *Monopterus javanensis* |  |
| Syngnathidae | *Doryichthyes deokhatoides* |  |
|  | *Doryichthys martensii* |  |
| Tetraodontidae | *Carinotetraodon lorteti* |  |
