# Supplementary material for: Determining High Conservation Values in Production Landscapes: Biodiversity and Assessment Approaches
Source: Frontiers journal article supplement (doi:10.3389/fenvs.2022.783794), 2022-07-06
Supplement: Table_9.docx [file Table_9.docx]

Supplementary Table 9. Successful HCV applications from Borneo that stated numbers of IUCN-listed (Vulnerable or more threatened) animal species in the public summary statement.

| **Applicant** | **Location** | **Type** | **Days of field work** | **Number of IUCN-listed animal species** | **Link** |
| --- | --- | --- | --- | --- | --- |
| Benta Wawasan | Sabah | Oil palm | 1 | 9 | https://hcvrn.egnyte.com/dl/zsubYsR2Y6/? |
| Asia Plantations LTD | Miri, Sarawak | oil palm | 5 | 18 | https://hcvrn.egnyte.com/dl/bsKpdilUGq/? |
| PT Agro Andalan | West Kalimantan | oil palm | 4 | 6 | https://hcvrn.egnyte.com/dl/k1mc2lLXGJ/? |
| PT Mirza Pratama | Central Kalimantan | oil palm | 2 | 4 | https://hcvrn.egnyte.com/dl/LnUCH5BECw/? |
| PT Sarana Esa Cita and PT Mulia Indah | West Kalimantan | oil palm | 15 | 8 | https://hcvrn.egnyte.com/dl/1zTiVtX3Rz/? |
| Cahaya Tiga Serangkai Cooperative, PT Cahaya Nusa Gemilang | West Kalimantan | oil palm | 5 | 1 | https://hcvrn.egnyte.com/dl/QjdRMKn2ZK/? |
| PT Buana Adhitama | Central Kalimantan | oil palm | 11 | 9 | https://hcvrn.egnyte.com/dl/ZYEThFUHSD/? |
| Tri Sejahtera Palm oil cooperative | Central Kalimantan | oil palm | 21 | 4 | https://hcvrn.egnyte.com/dl/ZYEThFUHSD/? |
| PT. Fodec Khatulistiwa | East Kalimantan | oil palm | 3 | 6 | https://hcvrn.egnyte.com/dl/hhwy9yqGU7/? |
| PT Multi Kusuma Cemerlang (PT MKC) - Royal Lestari Utama Group | East Kalimantan | rubber | 11 | 21 | https://hcvrn.egnyte.com/dl/KELChCM9p7/? |
| PT Bima Palma Nugraha | East Kalimantan | oil palm | 14 | 21 | https://hcvrn.egnyte.com/dl/NS51fsftxv/? |
| PT Menteng Jaya Sawit Perdana | Central Kalimantan | oil palm / rubber | 9 | 11 | https://hcvrn.egnyte.com/dl/SodRE5SYa0/? |
| PT Bima Agri Sawit | Provinsi Kalimantan | oil palm | 9 | 20 | https://hcvrn.egnyte.com/dl/1hPyCx4uuf/? |
| Aidenvironment | West Kalimantan | oil palm | 14 | 8 | https://hcvrn.egnyte.com/dl/1zTiVtX3Rz/? |
| PT Multipersada Gatramegah | Central Kalimantan | oil palm | 13 | 14 | https://hcvrn.egnyte.com/dl/hHKL4SHZUn/? |
| Felda Global Venture Asian Plantations | Sarawak | oil palm | 5 | 18 | https://hcvrn.egnyte.com/dl/bsKpdilUGq/? |
| PT Prasetya Mitra Muda | Central Kalimantan | oil palm | 25 | 10 | https://hcvrn.egnyte.com/dl/aJlfFneVJu/? |
| PT Putra Bongan Jaya | East Kalimantan | oil palm | 9 | 15 | https://hcvrn.egnyte.com/dl/K4ANobY2jm/? |
| PT Prasetia Utama | Provinsi Kalimantan | oil palm | 9 | 16 | https://hcvrn.egnyte.com/dl/V2R1brA98G/? |
| PT Mirza Pratama Putra | Central Kalimantan | oil palm | 8 | 4 | https://hcvrn.egnyte.com/dl/LnUCH5BECw/? |
| PT Kartanegara Kumalasakti | East Kalimantan | oil palm | 9 | 5 | https://hcvrn.egnyte.com/dl/3kbZkk2QxX/? |
| PT Usaha Agro Indonesia | West Kalimantan | oil palm | 6 | 3 | https://hcvrn.egnyte.com/dl/5DyIjNaKwW/? |
| PT Agro Andalan | West Kalimantan | oil palm | 4 | 6 | https://hcvrn.egnyte.com/dl/k1mc2lLXGJ/? |
| PT Mitra Nusa Sarana | West Kalimantan | oil palm | 7 | 9 | https://hcvrn.egnyte.com/dl/EsttfAwxSR/? |
| PT Agro Abadi Cemerlang | West Kalimantan | oil palm | 4 | 1 | https://hcvrn.egnyte.com/dl/9084tAPblQ/? |
| PT Damai Agro Sejahtera | West Kalimantan | oil palm | 7 | 13 | https://hcvrn.egnyte.com/dl/KMCL83g0NG/? |
